# Supplementary material for: Molecular Evaluation of Endometrial Dedifferentiated Carcinoma, Endometrioid Carcinoma, Carcinosarcoma, and Serous Carcinoma Using a Custom-Made Small Cancer Panel
Source: Pathol Oncol Res. 2021 Dec 23;27:1610013. doi: 10.3389/pore.2021.1610013 (PMC8734147; doi:10.3389/pore.2021.1610013)
Supplement: Supplementary file 2 [file Table3.xlsx]

## Sheet: Sheet1
	Supplemental Table S3 Summary for histological diagnosis and IHC profile in 36 cases
	Case No.	Histological diagnosis			IHC
					MLH1	MSH2	MSH6	PMS2	p53	WT1(%)	Vim(%)	CycD1(%)	ER(%)	ARID1A(%)	PTEN(%)
	1	EC(G2)			+	+	+	+	wt	0	>90	20	>90	ad: >90 solid: 0	ad: 0 solid: 80
	2	EC(G1)			+	+	+	+	wt	ad: 10 solid: 0	ad: 50 solid: >90	ad: 10 solid: 50	ad: 80 solid: 0	ad: 50 solid: 0	ad: 30 solid: 60
		EC(G2)
	3	EC(G2)			+	+	+	+	wt	0	>90	20	80	>90	40
	4	EC(G2)			neg.	+	+	neg.	wt	<5	>90	10	80	>90	0
	5	EC(G2)			+	+	+	+	wt	0	40	30	>90	>90	<5
	6	EC(G3)			neg.	+	+	neg.	wt	ad: 0 solid: 20	ad: 10 solid: 60	ad: >90 solid: 0	ad: >90 solid: 0	ad: >90 solid: 0	0
	7	EC(G2)			neg.	+	neg.	focal neg.	wt	10	80	30	>90	>90	20
	8	EC(G2)			+	+	+	+	wt	80	90	20	80	0	0
	9	EC(G2)			+	neg.	neg.	+	wt	0	30	20	>90	>90	0
	10	EC(G2)			+	+	+	+	wt	0	>90	20	>90	>90	0
	11	EC(G3)			+	+	neg.	+	wt	ad: 0 solid: 60	ad: 80 solid: 70	ad: 30 solid: 70	ad: >90 solid: 0	ad: >90 solid: 0	0
	12	EC(G2)			+	+	+	+	wt	40	>90	40	>90	0	0
	13	EC(G2)			+	+	+	+	wt	0	50	5	80	>90	0
	14	EC(G2)	gld.		+	+	+	+	mt	0	>90	10	>90	0	0
			solid		+	+	+	+	mt	0	>90	10	>90	0	0
	15	EC(G2)	gld.		+	+	+	+	wt	0	>90	20	>90	>90	0
			solid		+	+	+	+	wt	0	>90	40	60	>90	0
	16	EC(G3)			+	+	+	+	mt	ad: 0 solid: 0	ad: 90 solid: 90	ad: 10 solid: 40	ad: >90 solid: >90	ad: >90 solid: >90	ad: 20 solid: 20
	17	EC(G2)	gld.		+	+	+	+	wt	0	>90	20	>90	>90	30
			solid		+	+	+	+	wt	0	80	40	80	>90	30
	18	EC(G2)	gld.		neg.	+	+	neg.	wt	0	>90	10	>90	80	20
			solid		neg.	+	+	neg.	wt	0	0	80	0	0	0
	19	EC(G2)	gld.		+	+	+	+	wt	0	>90	60	70	>90	0
			solid		+	+	+	+	wt	0	>90	70	>90	>90	0
	20	DC	EC(G1)		neg.	+	+	neg.	wt	<5	>90	>90	>90	0	10
			De		neg.	+	+	neg.	wt	<5	70	>90	<5	0	0
	21	DC	EC(G3)		neg.	+	+	neg.	wt	30	80	40	>90	40	10
			De		neg.	+	+	neg.	wt	0	50	60	0	60	10
	22	DC	EC(G1)		neg.	+	+	neg.	wt	10	70	30	>90	>90	<5
			De		neg.	+	+	neg.	wt	<5	50	20	>90	>90	<5
	23	SC			+	+	+	+	mt	0	10	<5	50	>90	80
	24	SC			+	+	+	+	mt	0	0	10	20	0	0
	25	SC			+	+	+	+	mt	40	80	<5	80	>90	80
	26	SC	Ad		+	+	+	+	mt	<5	<5	30	0	>90	20
			Spn		+	+	+	+	mt	30	>90	60	0	>90	80
	27	SC			+	focal neg.	neg.	+	mt	<5	<5	<5	10	>90	0
	28	SC			+	+	+	+	mt	0	>90	60	0	>90	0
	29	SC			+	+	+	+	mt	>90	10	20	30	>90	80
	30	SC			+	+	+	+	mt	>90	10	0	>90	>90	0
	31	SC			+	+	+	+	mt	<5	<5	50	30	>90	<5
	32	CS			+	+	+	+	mt	car: 30 src: >90	car: 30 src: >90	car: 30 src: <5	<5	>90	car: 40 src: 80
	33	CS			+	+	+	+	mt	car: 0 src: 90	>90	car: 0 src: <5	car: 40 src: 0	>90	car: 0 src: 40
	34	CS	Car		+	+	+	+	wt	30	20	30	0	>90	60
			Src		+	+	+	+	wt	30	>90	50	0	>90	60
	35	CS	Car		neg.	+	+	neg.	wt	30	30	<5	<5	0	>90
			Src		neg.	+	+	neg.	wt	80	>90	<5	0	0	>90
	36	LCNEC			+	+	+	+	mt	<5	<5	<5	0	>90	70
	IHC, immunohistochemistry; Vim, vimentin; CycD1, cyclin D1; ER, estrogen receptor; EC, endometrioid carcinoma; gld., glandular part; solid, solid part; DC, dedifferentiated endometroid carcinoma; De, dedifferentiated part; Ad, adenocarcinoma part; CS, carcinosarcoma; Car, carcinomatous part; Src, sarcomatous part; SC, serous carcinoma; Spn, spindle cell part; LCNEC, large cell neuroendocrine carc…
