# Supplementary material for: Molecular Evaluation of Endometrial Dedifferentiated Carcinoma, Endometrioid Carcinoma, Carcinosarcoma, and Serous Carcinoma Using a Custom-Made Small Cancer Panel
Source: Pathol Oncol Res. 2021 Dec 23;27:1610013. doi: 10.3389/pore.2021.1610013 (PMC8734147; doi:10.3389/pore.2021.1610013)
Supplement: Supplementary file 3 [file Table4.xlsx]

## Sheet: Sheet1
	Supplemental Table S4 Summary for NGS profile in 36 cases
	Case No.	Histological diagnosis			MSI	TMB	CNA			SNV and deletion/insertion mutations
							Amp	Loss		PTEN	CTNNB1	PIK3CA	PIK3R1	ARID1A	TP53	MLH1	PMS2	MSH2	MSH6	POLE	POLD1	BRCA1	BRCA2	ATM	TERT
	1	EC(G2)			1.34	46.4				p.Arg130Gly	p.Ser45Phe		p.Met479fs	p.Pro239fs p.Lys622fs p.Ser620del
	2	EC(G1)			7.45	206				p.Asp24Tyr p.Arg130Gln	p.Arg486His p.Arg673Gln	p.Arg88Gln p.Arg357Gln p.Arg852Gln	p.Gln475Pro	p.Asp627Tyr p.Glu1767* p.Arg1989* c.3866+1G>A			p.Val63Met		c.2389G>T	p.Val411Leu			p.Glu532Lys p.Lys1883Asn p.Ser2773Tyr	p.Glu390* p.leu1295Phe
		EC(G2)			2.3	190.6				p.Asp24Tyr p.Arg130Gln	p.Lys354Thr p.Arg673Gln	p.Arg88Gln p.Ser173Tyr p.Arg770* p.Arg852Gln	p.Gln475Pro	p.Glu1767* p.Arg1989*					c.2389G>T	p.Val411Leu			p.Glu1126Gly p.Lys1883Asn p.Ser2773Tyr
	3	EC(G2)			0	15.5		MSH2 PTEN ATM BRCA2 RB1 NF1 BRIP1		p.Ile33del p.Phe90fs			p.Arg574fs
	4	EC(G2)			28.97	46.4	MYC FGFR2			p.Arg172fs p.Arg233*	p.Ser37Phe		c.1322_1354delATATTGAAGCTGTAGGGAAAAAATTACATGAAT	p.Pro1326fs										p.Arg250*
	5	EC(G2)			1.02	36.1	IDH1 ERBB4 EGFR CDK6 MET BRAF			p.Arg130Gly p.Ile306fs	p.Ser37Phe	p.Arg88Gln p.Thr1025Ala												p.Phe1201fs
	6	EC(G3)			46.61	46.4				p.Asn329fs			p.Glu458del	p.Tyr518* p.Pro1175fs	p.Arg202Cys
	7	EC(G2)			30.43	46.4	PIK3CA			p.Val45fs p.Arg233*		p.His419_Pro421del							p.Pro991Leu
	8	EC(G2)			2.04	30.9		PTEN		p.Arg233*	p.Asp32Tyr	p.His1047Arg		p.Gln944*
	9	EC(G2)			46.99	51.5				p.Arg233* p.Asp268fs				p.Arg1446*				p.Phe22fs
	10	EC(G2)			0	25.8				p.Glu157* c.209+1G>T				p.Gln439*
	11	EC(G3)			38.97	123.6				p.Arg14fs p.Arg15Ser	p.Asp32Asn		p.Arg647* p.Asp716Asn	p.Gln372fs p.Arg1989*	p.Arg175His				p.Met491fs
	12	EC(G2)			3.19	30.9				p.Tyr65fs p.Ser227fs			p.Val679fs	p.Gln1327fs p.Glu1765fs
	13	EC(G2)			4.04	643.9				p.Arg130Gln p.Phe154Leu p.Lys183Asn p.Phe341Cys		p.Arg88Gln p.Arg357Gln p.Arg1023Gln		p.Gly1340Asp p.Arg2158Gln	p.Arg213*		p.Arg107Trp p.Arg134Gln p.Arg427Cys	p.Asp758Asn	p.Arg298Gln p.Lys632Arg p.Glu641* p.Glu995Lys	p.Pro286Ser p.Val411Leu					p.Ser579Asn c.*334C>T
	14	EC(G2)	gld.		1.09	30.9		TP53		p.Asn276Lys p.Leu318fs	p.Gly34Val		p.Asn453dup	c.2732+2T>G	p.Arg273Cys
			solid		0.65	25.8				p.Asn276Lys	p.Gly34Val		p.Asn453dup	c.2732+2T>G
	15	EC(G2)	gld.		5.26	41.2				p.Asn323fs p.Ser338fs		p.Glu81Lys	p.Asn564Lys	p.Ala677fs
			solid		0.52	46.4				p.Asn323fs p.Ser338fs		p.Glu81Lys	p.Asn564Lys	p.Gln467* p.Ala677fs
	16	EC(G3)			2.65	10.3	FGFR1 MYC AKT1	PIK3R1 RB1 NF1 BRCA1		p.Cys105fs					c.993+1G>T
	17	EC(G2)	gld.		3.53	20.6				c.253+1G>T			p.Arg577fs p.Val703Ala
			solid		4.22	20.6				c.253+1G>T			p.Arg577fs p.Val703Ala
	18	EC(G2)	gld.		50.46	41.2						p.Gln546Lys p.Met1004Ile		c.3867-1G>A		p.Glu613_Phe614del				c.3582+5C>T	p.Arg678Trp		p.Ser2018fs
			solid		39.45	82.4						p.Met1004Ile		c.3867-1G>A		p.Glu613_Phe614del					p.Arg678Trp		p.Ser2018fsp. Pro3324Leu
	19	EC(G2)	gld.		2.72	365.7				p.Arg41Ile p.Arg130Gln p.Phe341Val	p.Arg90Gln p.Val122Ala p.Arg486Cys	p.Glu365Lys p.Val636Leu p.Leu1006Phe	p.Ser208Tyr p.Arg348*	p.Arg1989*			p.Ala96Thr	p.Glu483*	p.Arg1201Gln	p.Pro286Arg		p.Ser1320Tyr p.Ser1370Tyr	p.Glu1035Lys p.Glu1511Lys	p.Leu2077Ile p.Tyr2404Asp p.Arg2598*
			solid		5.82	283.3				p.Arg41Ile p.Arg130Gln p.Phe341Val		p.Glu365Lys p.Val636Leu p.Phe1016Cys	p.Ser208Tyr p.Arg348*	c.1350+2T>C p.Glu1542*				p.Glu483*	p.Arg240Gln p.Glu1322*	p.Pro286Arg			p.Glu1035Lys p.Arg2842Cys	p.Leu2077Ile p.Tyr2404Asp p.Arg2598*
	20	DC	EC(G1)		21.9	61.8				p.Cys136Arg		p.Pro2His p.Pro104Leu p.His1048Arg		p.Pro227fs p.Gly276fs							p.Asp289dup		p.Lys1691fs
			De		28.8	56.7		PTEN		p.Cys136Arg		p.Pro104Leu		p.Pro146fs p.Pro227fs		p.Ser388Phe					p.Asp289dup				p.Ala288Val
	21	DC	EC(G3)		41.5	77.3				p.Lys267fs p.Thr277Lys				p.Lys1072fs p.Ser1519fs	p.Lys373fs										p.Ala288Val p.Trp371Cys p.Arg481Gly
			EC(G1)		36.99	56.7				p.Lys267fs p.Thr277Lys	p.Leu337Pro			p.Gln372fs p.Tyr551fs p.Lys1072fs		p.Asn287fs					p.Tyr581His				p.Trp371Cys
			De		37.88	67		RB1		p.Lys267fs p.Thr277Lys	p.Leu337Pro			p.Tyr551fs p.Lys1072fs p.Ser1992Leu	p.Lys373fs				p.Ala69Thr		p.Tyr581His				p.Trp371Cys
	22	DC	EC(G1)		47.34	67		ATM		p.Asn323fs p.Lys330fs			p.Lys346fs p.Arg577fs			p.Ser577Ser p.Trp712*								p.Ser214fs
			De		45.28	56.7				p.Asn323fs p.Lys330fs		p.Ala289Val	p.Arg577fs			p.Ser577Ser p.Trp712*					p.Asp1013fs			p.Ser214fs
	23	SC			2.63	10.3	CCNE1	PIK3R1 CD274				p.Gly1049Arg			p.Arg249Ser
	24	SC			4.42	15.5	MYC CCNE1 FGFR2	PIK3R1 PTEN CDH1				p.Glu542Lys			p.Gly245Ser p.Leu43fs
	25	SC			7.27	5.2	CCND1 CCNE1 FGFR3	PTEN RB1							p.Arg248Gln
	26	SC	Ad		2.88	5.2	MYC CDK4 FGFR3	CD274 PTEN RB1							p.Ile255Ser
			Spn		7.36	30.9	MYC CDK4	PIK3R1 CDKN2A CD274 PTEN STK11							p.Ile255Ser
	27	SC			35.54	97.8		TP53 STK11				p.Arg93Gln p.His1047Arg			p.Arg306*						p.Arg352His c.2466+4C>T	p.Ala521Val		p.Gly2186Glu p.Arg3008cys
	28	SC			2.22	10.3	PIK3CA MDM2	MLH1 BRCA1 BRCA2 RB1 STK11							p.Ser241Phe
	29	SC			7.89	15.5	CCND1 CCNE1	CDH1 NF1 BRIP1 STK11				p.His1047Arg			p.Gln144*
	30	SC			ND	5.2	ERBB3	PIK3R1 ATM BRCA1 BRIP1							c.817C>T
	31	SC			3.42	5.2	PIK3CA ERBB4 CDK4								p.Ala276Gly
	32	CS			10	10.3	CCNE1 ERBB2 PIK3CA	MLH1 PIK3R1 APC CDKN2A PALB2				p.Glu542Val			p.Asn239Ser
	33	CS			12.59	20.6		PTEN ATM BRCA2 RB1		p.Glu299*			p.Gln455_Ser460del		p.Cys176Phe c.706T>A
	34	CS	Car		3.59	5.2	MYC CCND1	ARID1A ATM CDKN2A
			Src		8.55	5.2	CCND1
	35	CS	Car		51.05	56.7	MYC			p.Arg130Gly	p.Thr41delinsIleVal p.Arg124Cys			p.Pro234fs p.Ala2186fs								p.Ala1714Val		p.Ala3054Asp
			Src		48.73	51.5				p.Arg130Gly	p.Thr41delinsIleVal p.Arg124Cys			p.Pro234fs p.Ala2186fs										p.Ala3054Asp
	36	LCNEC			3.87	15.5		RB1		p.Tyr88fs			p.Leu570_Ile571del		p.Phe113Ser
	IHC, immunohistochemistry; CAN, copy number alteration; Amp, amplification; SNV, single nucleotide variant; MSI, microsatellite instability; TMB, tumor mutation burden; Vim, vimentin; CycD1, cyclin D1; ER, estrogen receptor; EC, endometrioid carcinoma; gld., glandular part; solid, solid part; DC, dedifferentiated endometroid carcinoma; De, dedifferentiated part; Ad, adenocarcinoma part; CS, carci…
